# Supplementary material
Source: PubMed Central journal article supplement (PMC3629807)
Supplement: supp_112.049676_Supplementary_table_S1.pdf [file supp_112.049676_Supplementary_table_S1.pdf]

Article title: Alcohol Cirrhosis Alters Nuclear Receptor and Drug Transporter Expression in Human Liver  
 Vijay R. More, Qiuqiong Cheng, Ajay C. Donepudi, David B. Buckley, Zhenqiang James Lu, Nathan J. Cherrington,  
 and Angela L. Slitt Drug Metabolism and Disposition

Supplementary Table S1: Gender, ethnicity, age, serum aspartate transaminase, alkaline phosphatase and bilirubin information of the human liver samples used in the study

| Sr. No. | Condition          | Gender | Ethnicity        | Age           | Serum Aspartate Transaminase (IU/L) | Serum Alkaline Phosphatase (IU/L) | Serum Total Bilirubin (mg/dL) |
|---------|--------------------|--------|------------------|---------------|-------------------------------------|-----------------------------------|-------------------------------|
| 1       | Normal             | F      | African American | 61            | not available                       | not available                     | not available                 |
| 2       | Normal             | F      | Caucasian        | 57            | not available                       | not available                     | not available                 |
| 3       | Normal             | F      | Caucasian        | 76            | not available                       | not available                     | not available                 |
| 4       | Normal             | F      | Caucasian        | 39            | not available                       | not available                     | not available                 |
| 5       | Normal             | F      | Caucasian        | 55            | not available                       | not available                     | not available                 |
| 6       | Normal             | F      | Caucasian        | 49            | not available                       | not available                     | not available                 |
| 7       | Normal             | M      | African American | 48            | not available                       | not available                     | not available                 |
| 8       | Normal             | M      | Caucasian        | 21            | not available                       | not available                     | not available                 |
| 9       | Normal             | M      | Caucasian        | 35            | not available                       | not available                     | not available                 |
| 10      | Normal             | M      | Caucasian        | 59            | not available                       | not available                     | not available                 |
| 11      | Normal             | M      | Caucasian        | 44            | not available                       | not available                     | not available                 |
| 12      | Normal             | M      | Caucasian        | 69            | not available                       | not available                     | not available                 |
| 13      | Normal             | M      | Caucasian        | 55            | not available                       | not available                     | not available                 |
| 14      | Normal             | M      | Caucasian        | 73            | not available                       | not available                     | not available                 |
| 15      | Normal             | M      | not available    | 49            | not available                       | not available                     | not available                 |
| 16      | Normal             | M      | not available    | 45            | not available                       | not available                     | not available                 |
| 17      | Normal             | F      | Caucasian        | 60            | not available                       | not available                     | not available                 |
| 18      | Normal             | F      | Caucasian        | 51            | not available                       | not available                     | not available                 |
| 19      | Normal             | M      | Caucasian        | 56            | not available                       | not available                     | not available                 |
| 20      | Normal             | M      | Caucasian        | 69            | not available                       | not available                     | not available                 |
| 21      | Normal             | M      | Caucasian        | 22            | not available                       | not available                     | not available                 |
| 22      | Normal             | M      | Caucasian        | 62            | not available                       | not available                     | not available                 |
| 23      | Steatosis          | F      | Caucasian        | 38            | 23                                  | not available                     | not available                 |
| 24      | Steatosis          | F      | not available    | 41            | 0                                   | not available                     | not available                 |
| 25      | Steatosis          | M      | Caucasian        | 40            | 34                                  | not available                     | not available                 |
| 26      | Steatosis          | M      | Caucasian        | 46            | 13                                  | not available                     | not available                 |
| 27      | Steatosis          | M      | Caucasian        | 37            | 75                                  | not available                     | not available                 |
| 28      | Steatosis          | M      | Caucasian        | 31            | 93                                  | not available                     | not available                 |
| 29      | Steatosis          | M      | Caucasian        | 46            | 19                                  | not available                     | not available                 |
| 30      | Steatosis          | M      | Caucasian        | 46            | 186                                 | not available                     | not available                 |
| 31      | Alcohol Cirrhosis  | F      | Caucasian        | 47            | 50                                  | 140                               | 2.8                           |
| 32      | Alcohol Cirrhosis  | F      | Caucasian        | 47            | 553                                 | 285                               | 34.5                          |
| 33      | Alcohol Cirrhosis  | F      | Caucasian        | 44            | 240                                 | 145                               | 31.3                          |
| 34      | Alcohol Cirrhosis  | F      | Caucasian        | 36            | 41                                  | not available                     | 2.2                           |
| 35      | Alcohol Cirrhosis  | F      | not available    | 48            | 36                                  | 116                               | 4.7                           |
| 36      | Alcohol Cirrhosis  | F      | not available    | 51            | 27                                  | 97                                | 0.7                           |
| 37      | Alcohol Cirrhosis  | F      | not available    | 33            | 681                                 | 56                                | 12.4                          |
| 38      | Alcohol Cirrhosis  | F      | not available    | 52            | 43                                  | 165                               | 6.3                           |
| 39      | Alcohol Cirrhosis  | M      | Caucasian        | 54            | 48                                  | 147                               | 2.2                           |
| 40      | Alcohol Cirrhosis  | M      | Caucasian        | 52            | 1425                                | 114                               | 4.9                           |
| 41      | Alcohol Cirrhosis  | M      | Caucasian        | 50            | 200                                 | 259                               | not available                 |
| 42      | Alcohol Cirrhosis  | M      | Caucasian        | 44            | 115                                 | 122                               | 6.4                           |
| 43      | Alcohol Cirrhosis  | M      | Caucasian        | 48            | 37                                  | 174                               | 4.1                           |
| 44      | Alcohol Cirrhosis  | M      | Caucasian        | 63            | 102                                 | 258                               | 15.4                          |
| 45      | Alcohol Cirrhosis  | M      | Caucasian        | 56            | 77                                  | 121                               | 5                             |
| 46      | Alcohol Cirrhosis  | M      | Caucasian        | 55            | 29                                  | 82                                | 2.3                           |
| 47      | Alcohol Cirrhosis  | M      | not available    | 42            | 28                                  | 305                               | 1.2                           |
| 48      | Alcohol Cirrhosis  | M      | not available    | 33            | 501                                 | 51                                | 18.9                          |
| 49      | Alcohol Cirrhosis  | M      | not available    | 46            | 47                                  | 159                               | 2.7                           |
| 50      | Diabetic-Cirrhosis | F      | not available    | not available | 34                                  | 180                               | not available                 |
| 51      | Diabetic-Cirrhosis | M      | Caucasian        | 62            | 71                                  | 79                                | 32.4                          |
| 52      | Diabetic-Cirrhosis | M      | Caucasian        | 39            | 1720                                | 178                               | not available                 |
| 53      | Diabetic-Cirrhosis | M      | Caucasian        | 52            | 30                                  | 173                               | 1.1                           |
| 54      | Diabetic-Cirrhosis | M      | Caucasian        | 36            | 144                                 | 222                               | 39.9                          |
| 55      | Diabetic-Cirrhosis | M      | Caucasian        | 65            | 68                                  | 118                               | not available                 |
| 56      | Diabetic-Cirrhosis | M      | Caucasian        | 50            | 200                                 | 259                               | 13.9                          |
| 57      | Diabetic-Cirrhosis | M      | Caucasian        | 57            | 215                                 | 353                               | 33.7                          |
| 58      | Diabetic-Cirrhosis | M      | not available    | 56            | 3930                                | 226                               | 6.8                           |
| 59      | Diabetes           | F      | Caucasian        | 68            | 66                                  | 199                               | not available                 |
| 60      | Diabetes           | F      | Asian            | 42            | 405                                 | 115                               | not available                 |
| 61      | Diabetes           | F      | African American | 49            | not available                       | not available                     | not available                 |
| 62      | Diabetes           | F      | Caucasian        | 51            | not available                       | not available                     | not available                 |
| 63      | Diabetes           | F      | Caucasian        | 39            | not available                       | not available                     | not available                 |
| 64      | Diabetes           | F      | Caucasian        | 72            | not available                       | not available                     | not available                 |
| 65      | Diabetes           | F      | Caucasian        | 46            | not available                       | not available                     | not available                 |
| 66      | Diabetes           | F      | Caucasian        | 74            | not available                       | not available                     | not available                 |
| 67      | Diabetes           | F      | Caucasian        | 53            | not available                       | not available                     | not available                 |
| 68      | Diabetes           | F      | Caucasian        | 38            | not available                       | not available                     | not available                 |
| 69      | Diabetes           | M      | Caucasian        | 57            | 35                                  | 124                               | not available                 |
| 70      | Diabetes           | M      | Caucasian        | 48            | 196                                 | 632                               | not available                 |
| 71      | Diabetes           | M      | African American | 44            | not available                       | not available                     | not available                 |
| 72      | Diabetes           | M      | Caucasian        | 66            | not available                       | not available                     | not available                 |
| 73      | Diabetes           | M      | Caucasian        | 55            | not available                       | not available                     | not available                 |
| 74      | Diabetes           | M      | Caucasian        | 74            | not available                       | not available                     | not available                 |
| 75      | Diabetes           | M      | Caucasian        | 39            | not available                       | not available                     | not available                 |
| 76      | Diabetes           | M      | Caucasian        | 70            | not available                       | not available                     | not available                 |
| 77      | Diabetes           | M      | Caucasian        | 46            | not available                       | not available                     | not available                 |
| 78      | Diabetes           | M      | Caucasian        | 33            | not available                       | not available                     | not available                 |
