# Supplementary material
Source: PubMed Central journal article supplement (PMC3629807)
Supplement: supp_112.049676_Supplementary_Table_S2.pdf [file supp_112.049676_Supplementary_Table_S2.pdf]

## Alcohol Cirrhosis Alters Nuclear Receptor and Drug Transporter

### Expression in Human Liver Drug Metabolism and Disposition

Vijay R. More, Qiuqiong Cheng, Ajay C. Donepudi, David B. Buckley, Zhenqiang

James Lu, Nathan J. Cherrington, and Angela L. Slitt

#### Supplementary Table S2: Type, dilution, molecular weight and source

information for antibodies used in western blot

| Antibody | Type                 | Dilution | Mol wt | Source                                        |
|----------|----------------------|----------|--------|-----------------------------------------------|
| ABCC1    | MRPr1                | 1:2000   | ~190   | Dr. G. Scheffer, VU Medical Center, Amsterdam |
| ABCC2    | M <sub>2</sub> III-5 | 1:600    | ~190   | Chemicon International- Millipore, MA         |
| ABCC3    | M <sub>3</sub> II-2  | 1:2000   | ~180   | Dr. G. Scheffer, VU Medical Center, Amsterdam |
| ABCC4    | M <sub>4</sub> I-10  | 1:2000   | ~160   | Dr. G. Scheffer, VU Medical Center, Amsterdam |
| ABCC5    | M <sub>5</sub> I-60  | 1:1000   | ~160   | Dr. G. Scheffer, VU Medical Center, Amsterdam |
| ABCC6    | M <sub>6</sub> II-68 | 1:1000   | ~165   | Dr. G. Scheffer, VU Medical Center, Amsterdam |
| ABCG2    | BXP-53               | 1:2000   | ~75    | Dr. G. Scheffer, VU Medical Center, Amsterdam |
| NQO1     | Ab2346               | 1:5000   | ~30    | Abcam, Cambridge, MA                          |
| GPX1     | AB16798              | 1:2000   | ~27    | Abcam, Cambridge, MA                          |
| NRF2     | SC13032              | 1:1000   | ~110   | Santa Cruz Biotech. Inc, Santa Cruz, CA       |
| GAPDH    | D16H11               | 1:2000   | ~37    | Cell Signaling Technology, Danvers, MA        |
